# Supplementary material for: Self‐Reported Health and Outcomes in Patients With Stable Coronary Heart Disease
Source: PubMed Central journal article supplement — J Am Heart Assoc. 2017 Aug 22;6(8):e006096. doi: 10.1161/JAHA.117.006096 (PMC5586450; doi:10.1161/jaha.117.006096), 2017-08-22
Supplement: JAH3-6-e006096-s001.pdf [file JAH3-6-e006096-s001.pdf]

# **Supplemental Material**

## **Appendix**

### **STABILITY Trial – Organizational**

#### **STABILITY Executive Steering Committee members**

##### *Co-chairmen:*

Harvey D White (Green Lane Cardiovascular Service, Auckland City Hospital, and Auckland University, Auckland, NZ; member of the VIGOUR Organization)

Lars Wallentin (Department of Medical Sciences and Uppsala Clinical Research Center, Uppsala University, Uppsala, SE; member of the VIGOUR Organization)

##### *Members:*

Andrzej Budaj (Grochowski Hospital, Warsaw, PL)

Christopher P Cannon (TIMI Study Group, Brigham and Women's Hospital, Boston, MA, US)

Robert A Harrington (Stanford University, Stanford, CA, US; member of the VIGOUR Organization)

Ph Gabriel Steg (INSERM-Unité, AP-HP; Hôpital Bichat; and Université Paris-Diderot, Paris, FR; Royal Brompton Hospital, London, UK; member of the VIGOUR Organization)

##### *GlaxoSmithKline Members:*

Richard Davies (GlaxoSmithKline, King of Prussia, PA, US)

Elizabeth Tarka (GlaxoSmithKline, King of Prussia, PA, US)

#### **STABILITY Executive Operations Committee members**

Harvey D White (Green Lane Cardiovascular Service, Auckland City Hospital, and Auckland University, Auckland, NZ; member of the VIGOUR Organization)

Lars Wallentin (Department of Medical Sciences and Uppsala Clinical Research Center, Uppsala University, Uppsala, SE; member of the VIGOUR Organization)

Claes Held (Department of Medical Sciences and Uppsala Clinical Research Center, Uppsala University, Uppsala, SE; member of the VIGOUR Organization)

Ralph Stewart (Green Lane Cardiovascular Service, Auckland City Hospital, and Auckland University, Auckland, NZ; member of the VIGOUR Organization)

Olga Bucan (Green Lane Cardiovascular Service, Auckland City Hospital, Auckland, NZ)

Charlotta Elfström (Uppsala Clinical Research Center, Uppsala University, Uppsala, SE)

Rebekkah Brown (GlaxoSmithKline, Research Triangle Park, NC, US)

Lisa Hegg (GlaxoSmithKline, King of Prussia, PA, US)  
Marie Jarosz (GlaxoSmithKline, King of Prussia, PA, US)  
Sue Krug-Gourley (GlaxoSmithKline, King of Prussia, PA, US)  
Jerry Rudman (GlaxoSmithKline, King of Prussia, PA, US) (Posthumous)  
Peter Smith (GlaxoSmithKline, Research Triangle Park, NC, US)  
Elizabeth Tarka (GlaxoSmithKline, King of Prussia, PA, US)

**STABILITY Steering Committee members/ National Coordinators**

Diego Ardissino (Azienda Ospedaliero-Universitaria di Parma, Parma, IT)  
Paul W Armstrong (University of Alberta, Edmonton, CA, US; member of the VIGOUR Organization)  
Alvaro Avezum (Dante Pazzanese Institute of Cardiology, São Paulo, BR)  
Philip E Aylward (South Australian Health and Medical Research Institute, Flinders University and Medical Centre, Adelaide, AU)  
Alfonso Bryce (Cardiogolf/Clinica El Golf, Lima, PE)  
Hong Chen (Peking University People's Hospital, Beijing, CN)  
Ming-Fong Chen (National Taiwan University Hospital, Taipei, TW)  
Ramon Corbalan (Pontificia Universidad Catolica de Chile, Santiago, CL)  
Anthony JDalby (Milpark Hospital, Johannesburg, ZA)  
Nicolas Danchin (AP-HP and Université Paris Descartes, Paris, FR)  
Robbert J De Winter (University of Amsterdam, Amsterdam, NL)  
Stefan Denchev (University Hospital Alexandrovska, Sofia, BG)  
Rafael Diaz (ECLA Estudios Cardiológicos, Latinoamérica, Rosario, AR)  
Moses Elisaf (University of Ioannina, Ioannina, GR)  
Marcus D Flather (University of East Anglia and Norfolk and Norwich University Hospital, UK)  
Assen R Goudev (Queen Giovanna University Hospital, Sofia, BG)  
Christopher B Granger (Duke University, Medical Center, Durham, NC, US; member of the VIGOUR Organization)  
Liliana Grinfeld (University of Buenos Aires, School of Medicine, Buenos Aires, AR)  
Claes Held (Uppsala Clinical Research Center, Uppsala University, Uppsala, SE)  
Judith S Hochman (NYU Langone Medical Center, New York, NY, US)  
Steen Husted (Hospital Unit West, Herning/Holstbro, DK)

Hyo-Soo Kim (Seoul National University Hospital, Seoul, KR)

Wolfgang Koenig (University of Ulm Medical Center, Ulm, DE)

Ales Linhart (Charles University in Prague, Prague, CZ)

Eva Lonn (McMaster University, Hamilton, Ontario, CA)

José López-Sendón (Hospital Universitario La Paz, Madrid, ES)

Athanasios J Manolis (Asklepeion Hospital, Athens, GR)

Emile R Mohler, III (University of Pennsylvania, Philadelphia, PA, US)

José C Nicolau (University of São Paulo Medical School, São Paulo, BR)

Prem Pais (St. John's Medical Collage, Bangalore, IN)

Alexander Parkhomenko (Institute of Cardiology, Kiev, UA)

Terje R Pedersen (University of Oslo and Oslo University Hospital, Oslo, NO)

Daniel Pella (PJ Safarik University, Kosice, SK)

Marco ARamos-Corrales (San Jose Satelite Hospital, Naucalpan, MX)

Mikhail Ruda (Russian Cardiologic Research and Production Complex of Rosmedtechnology, Moscow, RU)

Mátyás Sereg (St. George Hospital, Székesfehérvár, HU)

Saulat Siddique (Shaikh Zayed Postgraduate Medical Institute, Lahore, PK)

Peter Sinnaeve (University Hospitals Leuven, Leuven, BE)

Piyamitr Sritara (Mahidol University, Bangkok, TH)

Ralph Stewart (Green Lane Cardiovascular Service, Auckland City Hospital, and Auckland University, Auckland, NZ)

Henk P Swart (Antonius Hospital Sneek, NL)

Rody G Sy (University of the Philippines, Manila, PH)

Tamio Teramoto (Teikyo Academic Research Center, Itabashi-ku, Tokyo, JP)

Hung-Fat Tse (University of Hong Kong, Hong Kong SAR, CN)

W Douglas Weaver (Henry Ford Heart and Vascular Institute, Wayne State University, Detroit, MI, US)

Robert Weiss (Maine Research Associates, Auburn, ME, US)

Margus Viigimaa, Tallinn (University of Technology, Tallinn, EE)

Dragos Vinereanu (University of Medicine and Pharmacy, University and Emergency Hospital, Bucharest, RO)

Junren Zhu (Fudan University, Shanghai, CN)

### **Independent Data Monitoring Committee members (IDMC)**

*Chairman:* Rory Collins (University of Oxford, Oxford, UK)

#### *Voting Members*

Jeffrey Anderson (Intermountain Medical Center, Murray, UT, US)

David DeMets (University of Wisconsin–Madison, Madison, WI, US)

Peter Ganz (University of California-San Francisco, San Francisco, CA, US)

Peter Sandercock (Western General Hospital, Edinburgh, UK)

Michael Weber (SUNY Downstate College of Medicine, New York, NY, US)

### **Statistical Data Analysis Center**

Department of Biostatistics and Medical Informatics, University of Wisconsin–Madison, Madison, WI, US

#### *Staff Members*

Marian Fisher (Director); Kevin Buhr, Scott Diegel, and Melissa Schultz (Contributing Statisticians)

### **Clinical End Point Classification (CEC) - Cardiology**

*Chairman - CEC Cardiology:* Claes Held, Uppsala Clinical Research Center, Uppsala University, Uppsala, SE

*Co-chairman - CEC Cardiology:* Kenneth W Mahaffey, Duke Clinical Research Institute, Durham, NC, US

#### *Adjudicators – CEC Cardiology*

John H Alexander (Duke University School of Medicine, Durham, NC, US)

Sana Al-Khatib (Duke University School of Medicine, Durham, NC, US)

Tomasz Baron (Uppsala University Hospital, Uppsala, SE)

Olle Bergström (Växjö Hospital, Växjö, SE)

Cheryl Bushnell (Duke University School of Medicine, Durham, NC, US)

Christina Christersson (Uppsala University Hospital, Uppsala, SE)

Kai Eggers (Uppsala University Hospital, Uppsala, SE)  
Bengt-Olov Fredlund (Sahlgrenska University Hospital, Gothenburg, SE)  
Emil Hagström (Uppsala University Hospital, Uppsala, SE)  
Ziad Hijazi (Uppsala University Hospital, Uppsala, SE)  
Lovisa Holm Örndahl (Uppsala University Hospital, Uppsala, SE)  
Stefan K James (Uppsala University Hospital, Uppsala, SE)  
Tomas Jernberg (Karolinska University Hospital, Stockholm, SE)  
Nina Johnston (Uppsala University Hospital, Uppsala, SE)  
Renato D Lopez (Duke University School of Medicine, Durham, NC, US)  
Rajendra H Mehta (Duke University School of Medicine, Durham, NC, US)  
Kristin L Newby (Duke University School of Medicine, Durham, NC, US)  
Örjan Nordmark (Uppsala University Hospital, Uppsala, SE)  
Jonas Oldgren (Uppsala University Hospital, Uppsala, SE)  
Matthew T Roe (Duke University School of Medicine, Durham, NC, US)  
Katarina Saldéen (Sahlgrenska University Hospital, Gothenburg, SE)  
Anna Stenborg (Uppsala University Hospital, Uppsala, SE)  
Karolina Szummer (Karolinska University Hospital, Stockholm, SE)  
Christoph Varenhorst (Uppsala University Hospital, Uppsala, SE)  
Axel Åkerblom (Uppsala University Hospital, Uppsala, SE)

*Coordinating Sites – CEC Cardiology*

Uppsala Clinical Research Center (UCR), Uppsala University, Uppsala, SE (*Lead coordinating site*)  
Duke Clinical Research Institute (DCRI), Durham, NC, US  
GLCC Research Organization Ltd, Auckland, NZ

*Staff Members – CEC Cardiology*

*UCR:* Charlotta Elfström (CEC Project Lead); Ulrika Bodén and Pernilla Holmgren (CEC Coordinators); Christina Alm, Theresa Hallberg, and Margareta Forsman (CEC Monitors); Hanna Ljung and Camilla Svanberg (CEC Assistants)

*DCRI:* Patrick F Loeb (CEC Project Lead); Karen Atwater, Robert Baldwin, Maria Butts, Tuan Chan, Patricia Connolly, Gerry Esposito, Jacalyn B Hillier, Marla Jordan, Kathleen Lane, Debra Eckart

Kimberly O'Malia, Grace Ryan, Patsy Smitheran, Maunette Tait, and Sachin Vyas (CEC Monitors);  
Jessy Frazilus (CEC Assistant)

GLCC: Olga Bucan, Sarah Douglas (CEC Project Leads); Caroline Alsweiler, Lorinda Ball, Ana Bucan,  
and Laura Mackay (CEC Monitors)

### **Clinical End Point Classification (CEC) - Oncology**

*Chairman - CEC Oncology:* Stephen Wiviott (Brigham and Women's Hospital, Boston, MA, US)

#### *Adjudicators – CEC Oncology*

Gretchen Gignac (Boston Medical Center, Boston, MA, US)

Wolfram Goessling (Brigham and Women's Hospital, Boston, MA, US)

Ephraim Hochberg (Massachusetts General Hospital, Boston, MS, US)

Andrew Lane (Dana Farber Cancer Institute, Boston, MA, US)

Carol Rosenberg (Harvard Vanguard, Boston, MA, US)

Andrew Wagner (Dana Farber Cancer Institute, Boston, MA, US)

Brian M Wolpin (Dana Farber Cancer Institute, Boston, MA, US)

#### *Coordinating Site – CEC Oncology*

Thrombolysis in Myocardial Infarction (TIMI) Study Group, CEC Department, Brigham and Women's  
Hospital and Harvard Medical School, Boston, MA, US (*Lead coordinating site*)

Uppsala Clinical Research Center (UCR), Uppsala University, Uppsala, SE

Duke Clinical Research Institute (DCRI), Durham, NC, US

GLCC Research Organization Ltd, Auckland, NZ

#### *Staff Members – CEC Oncology*

*TIMI Study group:* Cheryl Lowe (CEC Director); Kristen Mills (CEC Manager); Maria Alkhalil and Jessica  
Ruvido (CEC Coordinators); Mian Qasim Rehman, Margarita Shimmer, and Irina Stebletsova (Medical  
Reviewers)

### **Statistical Centers and Involved Statisticians**

Allison Barnes (GlaxoSmithKline, Research Triangle Park, NC, US)

Rebekkah Brown (GlaxoSmithKline, Research Triangle Park, NC, US)

Karen Chiswell (Duke Clinical Research Institute, Durham, NC, US)

Rich Davies (GlaxoSmithKline, King of Prussia, PA, US)

Amanda Stebbins (Duke Clinical Research Institute, Durham, NC, US)

### **Central Laboratory**

Quest Diagnostics Clinical Laboratories, Inc., Valencia, CA, US

### **Data Coordination**

*Data management:* GlaxoSmithKline, R&D Projects Clinical Platforms & Sciences, King of Prussia, PA, US

*Registration And Medication Ordering System [RAMOS] interactive voice response system:*  
GlaxoSmithKline, R&D Platform Technology & Science, Upper Providence, PA, US

*Web-based Data Capture Vendor:* Oracle Health Sciences, Boston, MA, US

### **STABILITY Investigators by country**

Listed are investigators recruiting at least 1 patient. Number of patients included is listed in brackets.  
FPI = Former Principal Investigator at site

#### **Argentina**

Bustamante Labarta, Miguel, Instituto Medico de la Comunidad (IMEC), Buenos Aires (19);  
Cartasegna, Luis R, Hospital Italiano de La Plata, Buenos Aires (6); Chekherdemian, Sergio, Complejo Médico de la Policia Federal Argentina Churrucá-Visca, Ciudad Autonoma de Buenos Aires (16);  
Cuello, Jose L, Instituto de Investigaciones Clinicas Bahia Blanca, Buenos Aires (42); Elías, Pedro, INSARES, Mendoza (22); Giordano, Jorge, Clinica Instituto Medico Adrogué, Buenos Aires (23);  
Hirschson, Alfredo, CENIT- Centro de Neurociencias y Tratamiento- Buenos Aires, Buenos Aires (14);  
Hominal, Miguel Angel, Centro de Investigaciones Clinicas del Litoral S.R.L., Santa Fe, Santa Fe (47);  
Ibañez, Julio O, Instituto de Hipertension y Corazon, Corrientes (21); Jure, Horacio O, Clinica Chutro SRL, Córdoba (49); Litvak, Marcos, Instituto Medico Especializado, Ciudad Autonoma de Buenos Aires (25);  
Macin, Stella M, Instituto de Cardiologia JF Cabral, Corrientes (16); MacKinnon, Ignacio Jorge, Instituto de Investigacion Clinica de Mar del Plata, Buenos Aires (56); Maffei, Laura Elena, Consultorios Asociados de Endocrinología (CADE), Buenos Aires (43); Montaña, Oscar R, Clinica DIM Privada, Buenos Aires (39); Prado, Aldo D, Investigaciones Clinicas Tucuman, Tucuman (18); Sala, Jorgelina M, Gorosito, Vanina (FPI) Instituto de Investigaciones Clinicas Rosario, Santa Fe (68); Sanchez, Ramiro A, Fundapres, Ciudad Autonoma de Buenos Aires (18).

#### **Australia**

Brieger, David, Concord Hospital, Concord (6); Chew, Derek, Flinders Medical Centre, Bedford Park (9); Cross, David, The Wesley Research Institute, Auchenflower (20); De Looze, Ferdinandus J, Aus trials Pvt Ltd, Sherwood (36); Farshid, Ahmad, The Canberra Hospital, Garran (10); Hall, Stephen, Emeritus Research, Malvern (17); Krum, Henry, CCRE Clinical Trials Centre, Monash University, Caulfield Hospital, Caulfield (22); Lane, Geoff K, Fremantle Hospital, Fremantle (15); Oqueli Flores,

Ernesto, Stickland, John (FPI), Ballarat Health Service - Ballarat Base Hospital, Ballarat (6); Purnell, Peter W, Joondalup Clinical Trials Foundation Inc., Joondalup (55); Szto, Gregory YF, Peninsula Heart Centre, Peninsula Private Hospital, Frankston (20); Thompson, Peter L, Sir Charles Gairdner Hospital, Nedlands (22); Waites, Jonathan, Coffs Harbour Health Campus, Coffs Harbour (55); William, Maged, Gosford Hospital, Gosford (13).

## **Belgium**

Beauloye, Christophe, Cliniques Universitaires Saint-Luc, Brussels (28); Boland, Jean, Centre Hospitalier Régional de la Citadelle, Liège (10); Charlier, Filip, Imelda Ziekenhuis, Bonheiden (26); De Raedt, Herbert JLP, Onze-Lieve-Vrouwziekenhuis Aalst, Aalst (17); Dens, Joseph AY, Ziekenhuis Oost-Limburg, Genk (21); Dujardin, Karl, H.-Hartziekenhuis, Roeselare (23); Friart, Alain, Centre Hospitalier Universitaire de Tivoli, La Louvière (18); Scheen, André, Centre Hospitalier Universitaire de Liège, Liège (14); Schröder, Erwin, CHU Mont-Godinne, Yvoir (5); Sinnaeve, Peter R, Universitair Ziekenhuis Gasthuisberg, Leuven (17); Verheye, Stefan, LRAZNA Campus Middelheim, Antwerpen (3); Vranckx, Pascal, Jessa Ziekenhuis, Hasselt (20).

## **Brazil**

Abrantes, José A M, Santa Casa de Pelotas, Pelotas (23); Albuquerque, Denilson, Campos De Hospital Universitário Pedro Ernesto, Rio de Janeiro (24); Ardito, Wilma Roberta, Instituto de Moléstias Cardiovasculares – IMC, São José do Rio Preto (6); Baracioli, Luciano M, Instituto do Coracao HCFMUSP (INCOR), Sao Paulo (16); Bertolami, Marcelo C, Instituto Dante Pazzanese de Cardiologia, São Paulo (32); Bodanese, Luiz C, Hospital São Lucas da PUC-RS, Porto Alegre (19); Dos Santos Filho, Raul D, Instituto do Coração - INCOR, São Paulo (2); Maia, Lilia N, Fundação Faculdade Regional de Medicina de São José do Rio Preto, São José do Rio Preto (9); Manenti, Euler RF, Hospital Mãe de Deus, Instituto de Medicina Vascular, Porto Alegre (29); Marino, Roberto L, Madre Teresa - Cardiologia Clínica & Intervencionista, Belo Horizonte (2); Ogawa Indio do Brasil, Clarisse K, Instituto Dante Pazzanese de Cardiologia, São Paulo (21); Paiva, Maria Sanali de Oliveira, Natal Hospital Center, Natal (59); Rabelo, Alves Junior, Álvaro, Fundação Bahiana de Cardiologia, Salvador (10); Rassi, Salvador, Hospital das Clínicas da Universidade Federal de Goiás, Goiânia (31); Reis, Gilmar, Santa Casa da Misericórdia de Belo Horizonte, Belo Horizonte (45); Rossi, Paulo R F, Unicardios - Unidade de Atendimento do Coração S/S, Curitiba (42); Saraiva, José Francisco K, Hospital e Maternidade Celso Pierro da PUC Campinas, Campinas (14).

## **Bulgaria**

Benov, Haralambi, MHAT Dr. Stefan Cherkezov, Veliko Tarnovo (26); Chompalova, Boryana, MHAT Plovdiv, Plovdiv (5); Denchev, Stefan, Cardiology Clinic at MHAT Alexandrovska, Sofia (23); Goudev, Assen, Cardiology Clinic at MHAT Tsaritsa Yoanna, Sofia (24); Grigorova, Valentina, 1st internal ward at 1st MHAT Sofia, Sofia (29); Mihov, Atanas, Internal Department at MHAT Sveta Ekaterina, Dimitrovgrad (26); Mincheva, Valentina, Clinic of Cardiology at National Multiprofile Transport Hospital Tzar Boris III, Sofia (23); Petrova, Sylvia, Internal Cardiology Department at MHAT Ruse, Ruse (20); Staneva, Angelina, Raev, Dimitar (FPI), Clinic of cardiology and intensive treatment, Sofia (3); Tisheva, Snezhanka, Cardiology clinic at MHAT "Dr. Georgi Stranski", Pleven (43);

## **Canada**

Aronson, Ronnie, LMC Endocrinology Centres, Toronto (17); Bedard, Jacques, Recherche Clinique London/London Clinical Research, Sherbrooke (25); Bhargava, Rakesh K, Heart Care Research, Oshawa (10); Borts, David, Brampton Research Associates, Brampton (48); Constance, Christian, Clinique Sante Cardio MC, Montreal (50); Cusson, Jean, Hopital Charles LeMoyné, Greenfield Park (12); Davies, Richard F, University of Ottawa Heart Institute, Ottawa (14); Ducas, John, Saint Boniface General Hospital, Winnipeg (19); Ferguson, Murdo ER, Colchester Research Group, Truro (20);

Goldenberg, Ronald M, LMC Endocrinology Centres (Thornhill) Limited, Thornhill (35); Grondin, Francois, Clinique de Cardiologie de Levis, Levis (17); Gyenes, Gabor, University of Alberta Hospital, Edmonton (10); Halperin, Frank, Kelowna Cardiology Research, Kelowna (13); Kornder, Jan, SMH Cardiology Clinical Trials Inc., Surrey (18); Kouz, Simon, Centre de sante et de services sociaux de Nord de Lanaudiere, Saint Charles-Borromeo (51); Lainesse, Andre Y, Centre Investigation Clinique de la Mauricie Inc., Trois Rivieres (23); Leader, Rolland, Leader Medicine Professional Corporation, Ajax (20); Leiter, Lawrence A, Saint Michael's Hospital, Toronto (8); Lonn, Eva M, Hamilton Health Sciences, Hamilton (35); Milot, Alain, CHUQ Pavillon Saint Francois D'Assise, Quebec City (4); Pearce, Murray E, Murray Pearce Medicine Professional Corporation, Kitchener (5); Pliamm, Lew, Canadian Phase Onward Inc, Toronto (30); Powell, Calvin N, Dr. Calvin Powell Professional Medical Corporation, Bay Roberts (25); Rose, Barry F, Health Sciences Centre, St. John's (5); Rupka, Dennis W, Fraser Clinical Trials, Inc., New Westminster (35); Siega, Anthony JD, Klinke, Peter W (FPI), Victoria Heart Institute Foundation, Victoria (57); St-Amour, Eric, Q&T Research Outaouais Inc., Gatineau (49); Talbot, Paul, Centre de recherche clinique de Quebec Inc., Quebec City (45); Tardif, Jean-Claude, Montreal Heart Institute, Montreal (3); Tishler, Steven J, Mississauga Clinical Research Centre, Mississauga (29); Title, Lawrence, Queen Elizabeth II Health Sciences Center, Halifax (9); Wong, Graham C, Buller, Christopher E (FPI), Diamond Health Care Centre, Vancouver (39).

## **Chile**

Acevedo Blanco, Monica Andrea, Hospital Clinico Universidad Catolica de Chile, Santiago (14); Albornoz Alarcon, Francisco Javier, Hospital Las Higueras, Talcahuano (87); Escobar, Edgardo, Hospital San Borja Arriaran, Santiago (12); Florenzano Urzua, Fernando, Hospital Salvador, Santiago (17); Pedemonte Villablanca, Oneglio Antonio, Hospital Gustavo Fricke, Viña del Mar (14); Prieto Dominguez, Juan Carlos, Hospital Clinico Universidad de Chile, Santiago (28); Sanhueza Cardemil, Patricio, Centro de Estudios Clínicos Santiago Oriente, Santiago (10); Varleta Olivares, Paola Elena, Hospital Dipreca, Santiago (13).

## **China**

Chen, Hong, People's hospital of Peking University, Beijing (30); Chen, Jiyan, Guangdong General Hospital, Guangzhou (26); Dong, Yugang, 1st Affiliated Hospital of Sun Yat-Sen University, Guangzhou (19); Ge, Junbo, Zhongshan Hospital Affiliated to Fudan University, Shanghai (10); He, Ben, Ren Ji Hospital Affiliated to Shanghai Jiao Tong University, Shanghai (5); Huo, Yong, 1st Affiliated Hospital of Beijing University, Beijing (19); Li, Weimin, 1st Affiliated Hospital of Harbin Medical University, Haerbin (137); Li, Xin-li, Jiangsu Province Hospital, Nanjing (1); Liao, Yuhua, Wuhan Union Hospital, Wuhan (23); Wei, Meng, The Sixth Hospital of Shanghai Jiaotong University, Shanghai (12); Yan, Xiaowei, Peking Union Medical College Hospital, Beijing (17); Ye, Ping, Beijing 301 PLA Hospital, Beijing (3); Yuan, Zuyi, 1st Affiliated Hospital, Xian Jiaotong University, Xian (36); Zhang, Yun, Shandong University Qi Lu Hospital, Jinan (18); Zhu, Jianhua, 1st Affiliated Hospital of Zhejiang University, Hang Zhou (13).

## **Czech Republic**

Cermak, Ondrej, Nemocnice Slany, Slany (93); Dedek, Vratislav, Orlickoustecka nemocnice, Usti nad Orlici (72); Francek, Lumir, Kromerizska nemocnice, Kromeriz (57); Grunfeldova, Hana, Mestska nemocnice Caslav, Caslav (37); Hubac, Jan, Franc, Pavel (FPI), Chrudimska nemocnice, Chrudim (12); Kellnerova, Ivana, Svitavska nemocnice, Svitavy (63); Klimsa, Zdenek, Nemocnice Jihlava as, Jihlava (55); Kroupa, Josef, Oblastni nemocnice Kolin, Kolin (35); Kuchar, Ladislav, Vseobecna interni ambulance, Milevsko (51); Linhart, Ales, Vseobecna Fakultni Nemocnice - II. interni klinika, Praha 2 (64); Malecha, Jan, Ordinance pro choroby srdce, Chomutov (114); Povolny, Jiri, Cardiomed, s.r.o., P-P Klinika Kladno, Kladno (9); Velimsky, Tomas, Kardiologicka ambulance, Pisek (55); Volf, Roman, Jirka, Vladimir (FPI), Nemocnice Tabor, Tabor (57).

## Denmark

Bang, Lia, Grande, Peer (FPI), Rigshospitalet Hjertermedicinsk Forskningsenhed, Kobenhavn (36); Frost, Lars, Regionshospitalet Silkeborg, Silkeborg (30); Husted, Steen E, Aarhus Sygehus, Aarhus (16); Laursen, Rikke V, Nielsen, Tonny (FPI), Sydvestjysk Sygehus Esbjerg, Esbjerg (20).

## Estonia

Hedman, Anu, East-Tallinn Central Hospital, Tallinn (26); Muda, Piibe, Tartu University Clinic, Tartu (21); Planken, Ulle, North Estonia Regional Hospital, Tallinn (30).

## France

Barnay, Claude, Centre Hospitalier du Pays d'Aix, Aix en Provence cedex 1 (1); Bauters, Christophe, Hôpital Cardiologique, Lille Cedex (2); Bayet, Gilles, Clinique Rhône-Durance, Avignon (5); Bonnet, Jacques, Hôpital Cardiologique du Haut Lévéque, Pessac (20); Bruckert, Eric, Groupe Hospitalier PITIE-Salpetriere, Paris Cedex 13 (14); Cottin, Yves, CHU de Dijon - Complexe du Bocage, Dijon cedex (3); Courreges, Jean-Pierre, Centre Hospitalier de Narbonne, Narbonne Cedex (11); Danchin, Nicolas, Hôpital Européen Georges Pompidou Pole B, Paris (8); Decoux, Eric, Centre Hospitalier Hôpital Chatilliez, Tourcoing cedex (71); Demarcq, Jean-Michel, Hôpital Victor Provo, Roubaix (5); Dubois-Rande, Jean-Luc, Hôpital Henri Mondor, Créteil Cedex (3); Elbaz, Meyer, CHU Hôpital de Rangueil, Toulouse Cedex (26); Khalife, Khalifé, CHR De Metz-Thionville-Hospital De Mercy, Metz Cedex (24); Krempf, Michel, CHU de Nantes - Hôtel Dieu, Nantes cedex (20); Maupas, Eric, Hôpital Privé les Franciscaines, Nimes (5); Ovize, Michel, Groupe Hospitalier Est, Bron Cedex (11); Roul, José Gérald, Nouvel Hôpital Civil (NHC), Strasbourg cedex (3); Schiele, François, Bassand, Jean-Pierre (FPI), CHU - Hôpital Jean Minjoz, Besançon Cedex (6); Steg, Gabriel, Hôpital Bichat Claude Bernard, Paris cedex 18 (8); Vaisse, Bernard, CHU de Marseille - Hôpital de la Timone, Marseille cedex 5 (4).

## Germany

Aigner, Ulrich Michael, Praxis Dr. med. Ulrich Aigner, Sulzbach-Rosenberg (5); Bavendiek, Udo, Fischer, Dieter (FPI), Medizinische Hochschule Hannover, Hannover (3); Benedix, Gisela, Dr.med. Gisela Benedix, Berlin (5); Boeneke, Hilmar, Dr. med. Hilmar Boeneke, Lienen-Kattenvenne (9); Bott, Jochen, Praxis Dr.med. Jochen Bott, Berlin (37); Brado, Bernadett, Praxis Dr. med. Bernadett Brado, Heidelberg (8); Buhr, Marianne, Praxis Dr. med. Marianne Buhr, Berlin (2); Butter, Christian, Heart Center Brandenburg in Bernau, Bernau (2); Fischer, Steffen, Praxisgemeinschaft Dr.med. Steffen Fischer, Leipzig (43); Foerster, Andreas PD, Dr.med Andreas Foerster, Berlin (44); Grad, Marc Oliver, Polikum Friedenau MVZ GmbH, Berlin (9); Grosskopf, Josef, Dr.med. Josef Grosskopf, Wallerfing (10); Hanefeld, Markolf, GWT-TUD GmbH, Dresden (68); Hoeltz, Susanne, Frick, Horst-Michael (FPI), Susanne Hoeltz, Rhaunen (7); Illies, Gabriele, SMO. MD GmbH Zentrum fuer Klinische Studien, Magdeburg (88); Jung, Thomas WGE, Praxis Dr. med. Thomas Jung, Deggingen (24); Kademann, Barbara, Praxis Dr.med Barbara Kademann, Leipzig (11); Kahrman, Gert, Bourrat, Alexandra (FPI), Horacek, Thomas (FPI), Reusch, Regina (FPI), Dr.med Gerd Kahrman, Witten (9); Klausmann, Gerhard, Studienzentrum Haematologie/Onkologie/Diabetologie, Aschaffenburg (28); Klein, Christiane, Gem. Praxis Dr.med Christiane Klein, Kuenzing (14); Koenig, Wolfgang, Universitaetsklinikum Ulm/Oberer Eselsberg, Ulm (4); Krause, Karl Heinz, MedicoKIT Goch Institut fuer klinische Arzneimittelpruefungen, Goch (23); Kuesters, Detlev, Praxis Dr.med. Detlev Kuesters, Eschweiler (17); Mellwig, Klaus-Peter, Kardiologische Klinik, Bad Oeynhausen (25); Menke, Thomas, Praxis Dr. Thomas Menke, Goch (16); Mueller, Steve, Gem. Praxis Dr.med Steve Mueller, Gueglingen (24); Neumann, Gerhard, Praxis Dr. med. Gerhard Neumann, Delitzsch (52); Nischik, Ruth Medamed GmbH, Leipzig (31); Preusche, Andreas, Praxis Dr.med. Andreas Preusche, Schmiedeberg (20); Prohaska, Martin, Dr.med. Martin Prohaska, Muehldorf (4); Regner, Stefan Franz, Gem. Praxis Dr.med. Stefan Regner, Mainz (8); Rein, Wilfried, Dr.med. Wilfried Rein, Herford (24); Rummel,

Reinhard, Dr.med Reinhard Rummel, Berlin (20); Samer, Holger, Praxis Dr.med. Holger Samer, Haag (18); Schaefer, Thomas, Praxis Dr. med. Thomas Schaefer, Kelkheim (19); Schenkenberger, Isabelle, Isabelle Schenkenberger, Berlin (60); Schmidt, Ekkehard, Dr.med. Ekkehard Schmidt, Hamburg (71); Schoen, Norbert, Kardiologisch-angiologiscbe Schwerpunktpraxis, Muehldorf (3); Schreckenberger, Andreas, Dr.med. Andreas Schreckenberger, Weyhe-Leeste (15); Schulze, Uwe, Wunderlich, Joachim (FPI), Vivantes MVZ Praxis Dr. med. Uwe Schulze, Berlin (21); Sohn, Hae-Young, Klauss, Volker (FPI), Universitaetsklinikum Muenchen, Muenchen (3); Toursarkissian, Nicole, Praxis Dr. med. Nicole Toursarkissian, Berlin (66); Voigt, Jan-Gerrit, Dr.med. Jan-Gerrit Voigt, Dorsten (13); Weber, Dirk, Praxis Dr. med.Dirk Weber, Essen (65); Winkelmann, Bernhard R Dr.med, Prof. Dr.med. Bernhard Winkelmann, Hessen (11); Zuechner, Dirk, Dr.med. Dirk Zuechner, Berlin (30).

## **Greece**

Alexopoulos, Dimitrios, University Hospital of Patras, Patras (13); Anastasiou-Nana, Maria, Kremastinos, Dimitrios (FPI), University General Hospital Attikon, Athens (19); Elisaf, Moses, University General Hospital of Ioannina, Ioannina (21); Geleris, Parashos, Peripheral General Hospital Ippokratio, Thessaloniki (17); Kallikazaros, Ioannis, General Hospital of Athens Ippokratio, Athens (2); Kranidis, Athanasios, General Hospital of West Attica "Agia Varvara", Agia Varvara, Athens (18); Manolis, Athanasios, General Hospital Asklipieio Voulas, Voula / Athens (15); Mantas, Ioannis, General Hospital of Chalkida, Chalkida (34); Olympios, Christoforos, General Hospital of Elefsina Thriasio, Magoula (17); Tziakas, Dimitrios, University General Hospital of Alexandroupolis, Alexandroupolis (19); Voudris, Vassilis, Onassis Cardiac Surgery Center, Athens (12).

## **Hong-Kong**

Lam, Yat Yin Homer, Yip, Wai Kwok Gabriel (FPI), Prince of Wales Hospital, Shatin, New Territories (56); Siu, Chung Wah David, Queen Mary Hospital, Hong Kong (61).

## **Hungary**

Benczúr, Béla, Jász-Nagykun-Szolnok Megyei Hetényi Géza Kórház-Rendelőintézet, Szolnok (15); Hornyik, Andrea, CRU Hungary Kft- II. Rakoczi Ferenc Korhaz, Szikszó (96); László, Zoltán, Fovarosí Onkormanyzat Szent Janos Korhzaa es Eszak-budai Egyesített Korhazai, Budapest (26); Papp, András, ClinExpert kft, Kaszásdűlő u. 5., Budapest (14); Papp, Anikó, Területi Kórház, Berettyóújfalu (13); Plés, Zsolt, Piros, Annamária (FPI), CEE Research Kft, Sátoraljaújhely (113); Szakál, Imre Selye János Kórház, Komárom (16); Túri, Tibor, Sereg, Mátyás (FPI), Fejér Megyei Szent György Kórház, Székesfehérvár (67); Vértés, András, Fovarosí Onkormanyzat Egyesített Szent Istvan es Szent Laszlo Korhaz, Budapest (50).

## **India**

Abraham, Sunitha, Narayana Hrudayalaya Institute of Medical Sciences, Bangalore (1); Banker, Darshan N, Bankers Heart Institute, Vadodara (47); Chandwani, Prakash, Heart & General Hospital, Jaipur (25); Gupta, Rajeev, Fortis Escorts Hospital, Jaipur (17); Hiremath, Jagdish, Poona Hospital & Research Centre, Pune (33); Jayadev, Santhosh, St John's Medical College Hospital, Bangalore (9); Joseph, Stigimon, Menon, Jaideep (FPI), Little Flower Hospital and Research Centre, Angamaly (28); Keshavamurth, C, Srinivas, Arun (FPI), Vikram Hospital & Heart Care, Mysore (10); Parikh, Keyur, Care Institute of Medical Science, Ahmedabad (113); Pothineni, Ramesh B, Dr. Ramesh Cardiac & Multispeciality Hospital Limited, Vijayawada (52); Sathe, Shireesh P, Deenanath Mangeskar Hospital & Research Center, Pune (15); Sawhney, Jitendra P, Sir Ganga Ram Hospital, New Delhi (37); Sethi, Sumeet, Chandra, Praveen Kumar (FPI), Department of Cardiology, New Delhi (4); Varma, Sudhir, Sadbhavna Medical and Heart Institute, Patiala (7).

## **Italy**

Ardissino, Diego, Azienda Ospedaliero-Universitaria di Parma, Parma (47); Bobbio, Marco, Azienda Ospedaliera S.Croce e Carle, Cuneo (7); Bongo, Angelo S, Azienda Ospedaliera Maggiore della Carità, Novara (32); Cipollone, Francesco, Mezzetti, Andrea (FPI), Fondazione G. D'Annunzio-Centro Studi sull'Invecchiamento (Ce.S.I.), Chieti (32); Colivicchi, Furio, Santini, Massimo (FPI), Azienda Ospedaliera San Filippo Neri, Roma (24); Esposito, Giovanni, Chiariello, Massimo (FPI), Università degli Studi di Napoli Federico II, Dipartimento di medicina clinica, Napoli (15); Marzilli, Mario, Azienda Ospedaliero-Universitaria Pisana Ospedale di Cisanello, Pisa (19); Merlini, Piera, Ospedale Niguarda Ca' Granda - Dipartimento De Gasperis, Milano (28); Moretti, Luciano, Presidio Ospedaliero C.G. Mazzoni, Ascoli Piceno (25); Olivari, Zoran, Ospedale S. Maria di Ca' Foncello, Struttura Complessa di Cardiologia- Presidio Ospedaliero di Treviso, Treviso (13); Patrizi, Giampiero, Ospedale "B. Ramazzini", Carpi (5); Valgimigli, Marco, Azienda Ospedaliera-Universitaria Arcispedale S.Anna di Ferrara, Ferrara (9).

### **Japan**

Amemiya, Hiroshi, Hayama Heart Center, Kanagawa (23); Ando, Kenji, Iwabuchi, Masashi (FPI), Kokura Memorial Hospital, Fukuoka (3); Endo, Masahiro, Nagashima, Hirotaka (FPI), Tokyo Heart Center, Tokyo (18); Kametani, Ryosuke, Nagoya Tokushukai General Hospital, Aichi (7); Koike, Akihiro, National Hospital Organization Fukuoka-Higashi Medical Center, Fukuoka (8); Kuramochi, Takehiko, Chibanishi General Hospital, Chiba (20); Nakamura, Yuichiro, Nakamura Cardiovascular Clinic, Fukuoka (17); Oku, Koji, National Hospital Organization Nagasaki Medical Center, Nagasaki (18); Okutsu, Masaaki, Nozaki Tokushukai Hospital, Osaka (20); Sueyoshi, Atsushi, Uji Tokushukai Hospital, Kyoto (30); Takahashi, Wataru, Sasaki, Yasuyuki (FPI), National Hospital Organization Shinshu Ueda Medical Center, Nagano (16); Tanabe, Jun, National Hospital Organization Shizuoka Medical Center, Shizuoka (5); Tanaka, Hideki, Kashima, Katsuro (FPI), National Hospital Organization Kagoshima Medical Center, Kagoshima (16); Tanaka, Yutaka, Takeshita, Satoshi (FPI), Shonan Kamakura General Hospital, Kanagawa (23); Teranishi, Junichi, Betsuyaku, Tetsuo (FPI), National Hospital Organization Hokkaido Medic058187al Center, Hokkaido (24); Yamamoto, Takashi, Shiga University of Medical Science Hospital, Shiga (19); Yamazaki, Seiji, Sapporo Higashi Tokushukai Hospital, Hokkaido (20); Yano, Shoji, Oita city Medical Association's ALMEIDA Memorial Hospital, Oita (11); Yoshida, Kazuro, National Hospital Organization Nagasaki Kawatana Medical Center, Nagasaki (20).

### **Korea**

Chae, Jei-Keon, Chonbuk National University Hospital, Jeonju-si, Jeollabuk-Do (8); Chae, Shung-Chull, Kyungpook National University Hospital, Dae-Gu (28); Cho, Myeong-Chan, Chungbuk National University Hospital, Cheongju (53); Choi, Dong-Hoon, Yonsei University Health System, Seoul (22); Choi, Dong-Ju, Seoul National University Bundang Hospital, Seongnam-si Gyeonggi-do (10); Hong, Taek-Jong, Pusan National Univ. Hospital, Seo-gu Busan (61); Jeon, Hui-Kyung, The Catholic University of Korea, Uijeongbu-si (53); Jeong, MyungHo, Chonnam National University Hospital, Gwangju (30); Kim, Hyo-Soo, Seoul National University Hospital, Seoul (93); Kim, Hyun-Joong, Ryu, Kyu-Hyung (FPI), Konkuk University Medical Center, Seoul (11); Kim, Woo-Shik, Kim, Kwon-Sam (FPI), KyungHee University Medical Center, Seoul (29); Lee, Sang-Hoon, Samsung Medical Center, Gangnam-gu (26); Lim, Do-Sun, Korea University Anam Hospital, Seoul (43); Park, Seong-Wook, Asan Medical Center, Seoul (26); Seung, Ki-Bae, The Catholic Univ of Korea Seoul St. Mary's Hospital, Seoul (10).

### **Mexico**

Cervantes-Escárcega, Jose-Luis, Hosptial Angeles del Pedregal, Mexico (74); Hernández-Santamaría, Ismael, Hospital Juárez de México, México D.F (12); Sánchez-Díaz, Carlos Jerjes, Unidad de

Investigación Clínica en Medicina S.C., Monterrey (18); Uribe-Rios, Marittza-Arasely, Alvarado-Ruiz, Ricardo (FPI), Cardioprevent, Durango (37).

### **Netherlands**

De Winter, Robbert J, Academisch Medisch Centrum, Amsterdam (17); Dijkgraaf, René, St. Jansdal Ziekenhuis, Harderwijk (24); Jansen, Rutger M.G, Slingeland Ziekenhuis, Doetinchem (19); Knufman, Nicole M.J, Frederiks, Joost (FPI), Bronovo Ziekenhuis, S-Gravenhage (12); Kuijper, Adrianus, F.M Spaarne Ziekenhuis, Hoofddorp (24); Post, Johannes C, Michels, Herman R (FPI), Catharina Ziekenhuis, Eindhoven (17); Roeters van Lennep, Hendrik W.O, Liem, AnHo (FPI), Admiraal de Ruyter Ziekenhuis, Goes (28); Smits, Pieter C, Maasstad Ziekenhuis, Rotterdam (6); Swart, Hendrik P, Antonius Ziekenhuis, Sneek (48); Van Boven, Adrianus J, Medisch Centrum Leeuwarden, Leeuwarden (107); Van Daele, Marc ERM, Orbis Medisch Centrum, Sittard-Geleen (28); Van der Zwaan, Coenraad, Ziekenhuis Rivierenland, Tiel (36); Von Birgelen, Clemens, Medisch Spectrum Twente locatie Haaksbergerstraat, Enschede (64); Westendorp, Iris C.D, Rode Kruis Ziekenhuis, Beverwijk (14).

### **New Zealand**

Davidson, Laura, Palmerston North Hospital, Palmerston North (19); Devlin, Gerard P, Waikato Hospital, Hamilton (22); Elliott, John M, Christchurch Hospital, Christchurch (17); Hamer, Andrew W, Nelson Hospital, Nelson (3); Harrison, Nigel A, Rankin, Richard J (FPI), Whangarei Hospital, Whangarei (11); Hart, Hamish H, North Shore Hospital, Auckland (9); Hills, Matthew J, Timaru Hospital, Timaru (6); O'Meeghan, Timothy J, Hutt Hospital, Lower Hutt (16); Scott, Douglas S, Middlemore Hospital, Auckland (14); Stewart, Ralph AH, Auckland City Hospital, Auckland (46); Tisch, Jonathan G, Tauranga Hospital, Tauranga (21); Williams, Michael JA, Chen, Victor HT (FPI), Dunedin Hospital, Dunedin (18).

### **Norway**

Berge, Christ, Helse Bergen HF, Bergen (25); Istad, Helge, Radhuset Specialistsenter, Oslo (60); Pedersen, Terje R, Ullevål Universitetssykehus, Oslo (8); Sirnes, Per Anton, Ostlandske Hjertesenter, Moss (20).

### **Pakistan**

Hanif, Bashir, Tabba Heart Institute, Karachi (35); Ishaq, Riaz, The Indus Hospital, Karachi (31); Kayani, Azhar Mahmood, Armed Forces Institute of Cardiology/National Institute of Heart Diseases, Rawalpindi Cantt Rawalpindi Institute of Cardiology Rawalpindi (46); Qureshi, Muhammad Bilal Ahsan, Ch PervaizElahi Institute of Cardiology, Multan (33); Siddique, Saulat, Shaikh Zayed Hospital, Lahore (80); Yaqub, Zia, National Institute of Cardiovascular Diseases, Karachi (25).

### **Peru**

Doig, Rafael, Britto, Frank. (FPI), Centro de Investigación INCOR, Lima (27); Yanac, Pedro, Horna, Manuel (FPI), Valdivia, José (FPI), Hospital Nacional Alberto Sabogal Sologuren, Callao (41); Zubiato, Mario Cesar, Hospital Nacional Edgardo Rebagliati Martins, Lima (10).

### **Philippines**

Abelardo, Nelson S, Manila Doctors Hospital, Manila (9); Abola, Maria Teresa B, Philippine Heart Center, Quezon City (23); Añonuevo, John C, Philippine General Hospital, Manila (35); Atilano, Alberto A, Perpetual Succor Hospital, Manila (44); Cheng, Federick C, St. Luke's Medical Center, Quezon City (15); Gaspar-Trinidad, Emma Y, Medical Center Manila, Manila (9); Sison, Jorge A, Mezzanine 24, Manila (32); Sulit, Dennis Jose V, Quirino Memorial Medical Center, Quezon City

(10); Sy, Rody G, Cardinal Santos Medical Center, San Juan (24); Uy, Norbert Lingling, UERM Memorial Medical Center, Quezon City (18).

## **Poland**

Budaj, Andrzej, Szpital Grochowski im. dr med. Rafała Masztaka- Samodzielny Publiczny Zakład Opieki Zdrowotnej, Warszawa (22); Chmielinski, Arkadiusz, Poradnia Rodzinna Zdrowie, Plonsk (31); Czepiel, Aleksandra, Poradnia Rodzinna Zdrowie, Warszawa (27); Guzniczak, Ewa M, Siminiak, Tomasz (FPI), Szpital Rehabilitacyjno-Kardiologiczny, Oborniki (7); Kania, Grzegorz, NZOZ Przychodnia Zdrowia Zadebie, Skierniewice (71); Kincel, Krzysztof, Wielospecjalistyczny Niepubliczny Zakład Opieki Zdrowotnej, Slaskie (11); Kopaczewski, Jerzy, Szpital Wojewodzki we Wloclawku, Wloclawek (50); Kubica, Jacek, Niepubliczny Zakład Opieki Zdrowotnej MEDICUS Jacek Kubica, Bydgoszcz (7); Lysek, Roman, Lecznica CITOMED Sp. z o.o., Torun (43); Miekus, Pawel, Gabinet Kardiologiczny MEDIPULS, Gdynia (53); Młodziankowski, Adam, American Heart of Poland, Mielec (26); Napora, Piotr, NZOZ Centrum Badań Klinicznych, Wroclaw (32); Prochaczek, Fryderyk, Niepubliczny Specjalistyczny Zakład Opieki Zdrowotnej, Tychy (18); Ruscika, Teresa, Vitamed - A. Galaj R. Cichomski Sp. j., Bydgoszcz (67); Tarchalski, Janusz, Niepubliczny Specjalistyczny Zakład Opieki Jantar, Ostrow Wielkopolski (14); Tracz, Wiesława, Krakowski Szpital Specjalistyczny im. Jana Pawła II w Krakowie, Krakow (24); Wrzosek, Bożena, Wojewodzki Szpital Specjalistyczny Samodzielny Publiczny Zakład opieki Zdrowotnej, Radom (7).

## **Romania**

Basarab, Gheorghe V, Spitalul Clinic Judetean de Urgenta Deva, Deva (26); Benedek, Imre, Spitalul Clinic Judetean de Urgenta Targu Mures, Targu Mures (59); Cinteza, Mircea, Spitalul Universitar de Urgenta Bucuresti, Bucharest (32); Cristea, Madalina I, CMDTAMP, Bucharest (14); Dimulescu, Doina R, Spitalul Universitar de Urgenta Elias, Bucharest (12); Dragusin, Daniela, Spitalul Clinic Judetean de Urgenta "Sf. Ap. Andrei", Galati (22); Gabor, Iulia, Spitalul Clinic de Urgenta "Sf. Ioan" Bucuresti, Bucharest (44); Ginghina, Carmen D, Institutul de Boli Cardiovasculare C.C. Iliescu, Bucuresti (25); Macarie, Cezar E, Institutul de Boli Cardiovasculare C.C. Iliescu, Bucuresti (93); Sinescu, Crina, Spitalul Clinic de Urgenta Bagdasar-Arseni, Bucharest (17); Tatu-Chitoiu, Gabriel, Cardiomed Clinic, Bucharest (13); Vinereanu, Dragos, Spitalul Universitar de Urgenta Bucuresti, Bucharest (54).

## **Russia**

Andryushina, Natalya A, Baum, Svetlana R (FPI), Non-state Institution of healthcare "Road clinical hospital on station Novosibirsk-Glavny of OAO "Russian Railways", Novosibirsk (9); Arkhipov, Mikhail V, LLC Medical Association "New hospital", Yekaterinburg (26); Barbarash, Olga L, Municipal Health care Institution "Kemerovo Cardiological Dispensary", Kemerovo (28); Boldueva, Svetlana, State educational institution of higher professional education Saint-Petersburg's State Medical Academy n.a.I.I.Mechnikov, Saint Peterburg (25); Boyarkin, Mikhail V, Saint Petersburg State Institution of Healthcare, Alexandrovskaya city hospital, Saint Petersburg (6); Demko, Arkady P, Non State Institution of healthcare Department hospital on station Kemerovo of OAO "Russian Railway", Kemerovo (18); Freydlin, Marina S, State financed Institution of healthcare of Sverdlovsk's Region "Scientific practical center for special kinds of medical care" Ural Institution of Cardiology, Yekaterinburg (14); Golitsyn, Sergei P, Federal State Institution Russian Cardiology Research Complex Institute of Clinical Cardiology, Moscow (20); Gordeev, Ivan, State Institution of healthcare of Moscow, Moscow Clinical Hospital No.15 n.a.O.M Filatov, Moscow (38); Gratsiansky, Nikolay, State Institution of healthcare of Moscow, City clinical hospital No. 29 n.a., Moscow (31); Karpov, Yuri A, Federal State Institution Russian Cardiology Research Complex, Institute of Clinical Cardiology, Moscow (23); Kobalava, Zhanna, State Institution of healthcare of Moscow, City clinical hospital No.64, Moscow (21); Konstantinov, Vladimir, State educational institution of higher professional education, Saint Petresburg (14); Kuimov, Andrey D, State Educational Institution for higher

professional education Novosibirsk State Medical University based at Municipal Institution of healthcare City Clinical Hospital No.1, Novosibirsk (23); Kukharchuk, Valery V, Federal State Institution Russian Cardiology Research Complex Institute Of Clinical Cardiology, Moscow (9); Panov, Alexey, Federal State Institution " Federal center of heart blood and endocrinology n.a.V.A Almazov of Rosmedtechnologies, Saint-Petersburg (43); Ruda, Mikhail Y, Federal State Institution Russian Cardiology Research Complex Institute of Clinical Cardiology, Moscow (45); Sayganov, Sergey A, Saint-Petersburg State Institution of healthcare Pokrovskaya city hospital, Saint-Petersburg (55); Simanenkov, Vladimir, Saint-Petersburg State Institution of Healthcare City Hospital No. 26, Saint-Petersburg (14); Smolenskaya, Olga G, City Hospital No. 41, Yekaterinburg (13); Tsyba, Larisa P, Municipal Institution of healthcare Novosibirsk's municipal clinical hospital of Emergency Call Service No.2, Novosibirsk (17); Vishnevsky, Alexander Y, Saint-Petersburg State Institution of healthcare Pokrovskaya city hospital, Saint-Petersburg (57); Yakhontova, Polina K, State financed Institution of healthcare of Novosibirsk's Region "Novosibirsk's Regional Clinical Cardiological Dispensary", Novosibirsk (21); Yakushin, Sergey S, State Institution of healthcare Ryazan Regional Clinical Cardiology Dispensary, Ryazan (53); Zateyshchikov, Dmitry A, State Institution of healthcare of Moscow City Hospital No. 17, Moscow (31).

### **Slovakia**

Gaspar, Ludovit, Univerzitna nemocnica Bratislava, Bratislava (12); Hranai, Marian, Kardiocentrum Nitra, Nitra (52); Kokles, Martin, Univerzitna nemocnica Bratislava, Bratislava (16); Pella, Daniel, Cardio D&R, s.r.o., Kosice (40).

### **South Africa**

Badat, Aysha, Sliwa-Hahnle, Karen (FPI), Chris Hani Baragwanath Clinical Trial Centre, Soweto (2); Bignaut, Suzanne, Paarl Research Centre, Paarl (32); Burgess, Lesley, Tygerberg Hospital, Cape Town (69); Dalby, Anthony, Millpark Hospital, Suite C, Johannesburg (6); Dawood, Saleem Y, Vincent Pallotti Hospital, Pinelands (52); Gray, Thomas, Scion Clinical Research, Pretoria (10); Horak, Adrian R, Vincent Pallotti Hospital, Pinelands (5); Mabin, Thomas, Vergelegen Medi Clinic, Somerset West (18); Manga, Pravin, Wits Donald Gordon Clinical Trial Site, Gauteng (15); Moodley, Rajendran, Netcare Umhlanga Medical Centre, Umhlanga (11); Pretorius, Maria M, Hough, Frans S (FPI), Karl Bremer Hospital, Bellville (19); Roodt, Andre, ClinResco Centre, Kempton Park (3); Saaiman, Jan, Kuils River Private Hospital, Kuils River (117); Theron, Hendrik D, Netcare Universitas Hospital, Bloemfontein (27).

### **Spain**

Alonso Karlezi, Rodrigo, Mata López, Pedro (FPI), Fundación Jiménez Díaz, Madrid (2); Aranda Granados, Pedro, Hospital Carlos Haya, Malaga (5); Berrazueta Fernández, José Ramón, Hospital Marques de Valdecilla, Santander (2); Carnevali Ruiz, Daniel, Hospital Quirón Madrid, Pozuelo de Alarcón/Madrid (13); Castro Conde, Almudena, Hospital de Cantoblanco La Paz, Madrid (45); Cruz Fernández, José M<sup>a</sup>, Hospital Virgen de la Macarena, Sevilla (36); De Teresa Galván, Eduardo, Hospital Clinico Universitario Virgen Victoria, Malaga (19); De Teresa Parreño, Luis, Camino Viejo Alicante-Elche s/n, Alicante (26); Díaz Buschmann, Isabel, Hospital Infanta Elena, Valdemoro/Madrid (26); Domínguez Escribano, José Ramón, Hospital San Juan, Alicante (18); Garcia Puig, Juan, Hospital la Paz, Madrid (24); Gil Extremera, Blas, Hospital Clínico San Cecilio, Granada (67); Gómez Cerezo, Jorge, Hospital Infanta Sofía, San Sebastián de los Reyes/Madrid (10); Macaya, Carlos Miguel, Hospital Clinico San Carlos, Madrid (20); Mostaza Prieto, José M<sup>a</sup>, Instituto de Salud Carlos III, Madrid (13); Muñoz Aguilera, Roberto, Hospital Infanta Leonor, Madrid (15); Pérez Muñoz, Carlos, Hospital General de Jerez de la Frontera, Jerez de la Frontera (60); Querejeta Iraola, Ramón, Hospital de Donostia, San Sebastián (17); Romero Hinojosa, José Antonio, Hospital Virgen de las Nieves, Granada (9); Ruilope Urioste, Luis Miguel, Hospital Doce De Octubre, Madrid (6); Sabán Ruiz, José,

Hospital Ramon Y Cajal, Madrid (14); Sobrino Martínez, Javier, Hospital Espiritu Santo, Sta. Coloma de Gramanet/Barcelona (6); Suárez Suárez, Enma Concepción, Lozano Martínez-Luengas, Iñigo (FPI), Hospital Central de Asturias, Oviedo (21).

### **Sweden**

Al-Khalili, Faris, Stockholm Heart Center, Stockholm (22); Bandh, Stellan, Hjärtmottagningen, Västerås (4); Bennermo, Marie, Hjärt kärllaboratoriet, Stockholm (9); Dellborg, Mikael, Klin Exp Forskningslab, Göteborg (15); Held, Claes, Uppsala Kliniska Forskningscentrum UCR, Uppsala (8); Herlitz, Johan, Johanson, Per (FPI), Kardiologens forskningsenhet, Göteborg (10); Hjelmaeus, Lars, City Heart, Stockholm (39); Landergren, Karl, Forskningsmottagning Avd. 4, Västervik (11); Linderfalk, Carina, Eksjö Företagshälsövård, Eksjö (38); Lindholm, Carl-Johan, Hjärtmottagningen, Lund (35); Lindmark, Krister, Kliniskt forskningscentrum, Umeå (20); Mooe, Thomas, Hjärtenhetens Mottagning, Östersund (35); Nilsson, Jan, Klinisk forskningsenhet, Malmö (42); Wodlin, Peter, Kardiologiska kliniken, Linköping (11).

### **Taiwan**

Ho, Yi-Lwun, National Taiwan University Hospital, Taipei (41); Hou, Charles, Mackay Memorial Hospital, Taipei City (15); Hsia, Chien-Hsun, Changhua Christian Hospital, Changhua (41); Lin, Shing-Jong, Taipei Veterans General Hospital, Taipei (15); Tsai, Liang-Miin, National Cheng Kung University Hospital, Tainan (49); Wang, Kuo-Yang, Taichung Veterans General Hospital, Taichung (39).

### **Thailand**

Chotinaiwattarakul, Chunhakasem, Her Majesty Cardiac Centre, Siriraj Hospital, Bangkok (13); Kuanprasert, Srun, Maharajnakorn Chiangmai Hospital, Amphoe Muang, Chiang Mai (80); Sansanayudh, Nakarin, Phramongkutklao Hospital, Bangkok (56); Sritara, Piyamitr, Ramathibodi Hospital, Mahidol University, Bangkok (36); Suithichaiyakul, Taworn, Chulalongkorn University, Bangkok (22).

### **Ukraine**

Andriyevska, Svitlana, Odesa Regional Cardiodispensary, Odesa (5); Basylevych, Andriy Y, Lviv City Municipal Clinical Hospital No. 5, Lviv (16); Denesiuk, Vitaliy I, Vinnytsia City Clinical Hospital #1, Vinnytsia (46); Kononenko, Lyudmyla G, City Clinical Hospital No 27, Kharkiv (39); Korzh, Oleksii M, Multifield Clinical Hospital 17 n.a. Malyshev, Kharkiv (21); Kovalenko, Volodymyr M, National Scientific Centre M.D.Strazhesko Institute of cardiology of AMS of Ukraine, Kyiv (9); Kraiz, Igor G, Kharkiv State Treatment and Preventive Institution "Central Clinical Hospital of Ukrzaliznytsia", Kharkiv (52); Lishnevskaya, Viktoriia Y, Institute of Gerontology of AMS of Ukraine, Kyiv (15); Lutay, Mykhaylo I, Strazgesko Research Institute of Cardiology, Kyiv (4); Parkhomenko, Oleksandr M, National Scientific Centre "M.D.Strazhesko Institute of cardiology", Kyiv (25); Rudenko, Leonid V, Kyiv Emergency Care Hospital, Kyiv (21); Telyatnikova, Zinaida Y, Odesa City Polyclinic No.20, Odesa (13); Tseluyko, Vira Y, City Clinical Hospital # 8, Kharkiv (47); Vatutin, Mykola T, Institute of Urgent and Reconstructive Surgery, Donetsk (19); Vizir, Vadym A, Zaporizhzhia City Clinical Hospital No.7, Zaporizhzhia (21).

### **United Kingdom**

Bakhai, Ameet, Barnet Hospital, Barnet (18); Bijral, Harbal S, Stewart, Edmund (FPI), Central Health Centre, Cumbernauld (8); Dargie, Henry, Barlow, Marion G (FPI), Clinical Research Initiative, Glasgow (2); Dutka, David P, Addenbrooke's Hospital, Cambridge (3); Findlay, Iain N, Royal Alexandra Hospital, Paisley (6); Fisher, Michael, Royal Liverpool University Hospital, Liverpool (32); Gorog, Diana A, Queen Elizabeth II Hospital, Hertfordshire (5); Jacques, Adam M, Beeton, Ian (FPI), St Peter's

Hospital, Chertsey (4); Logie, Brian, Orchard Medical Centre, Motherwell (20); Pepper, John R, Flather, Marcus D (FPI), Royal Brompton Hospital, Chelsea (6); Purcell, Ian F, Freeman Hospital, Newcastle-upon-Tyne (29); Scullion, William, Thompson, James F (FPI), Waverley Medical Practice, Coatbridge Health Centre, Coatbridge (8); Senior, Roxy, Northwick Park Hospital, Harrow (3); Simpson, David A, Low Waters Medical Centre, Hamilton (13); Thackray, Simon DR, Alamgir, Mohammed F (FPI), Castle Hill Hospital, Cottingham (4); Wilding, John PH, University Hospital Aintree, Liverpool (6); Wong, Yuk-ki, St. Richard's Hospital, Chichester (17).

## **United States**

Ahmed, Abdel M, Altru Health System Clinic, Grand Forks, North Dakota (15); Antonishen, Mark C, Northern Michigan Regional Hospital, Petoskey, Michigan (15); Atassi, Keith, Northwest Indiana Cardiovascular Physicians, Valparaiso, Indiana (4); Azocar, Jose, Northgate Medical P.C., Springfield, Massachusetts (5); Ball, Eric M, Walla Walla Clinic, Walla Walla, Washington (17); Ballantyne, Christie M, Baylor College of Medicine, Houston, Texas (19); Bays, Harold E, L-Marc Research Center, Louisville, Kentucky (30); Beavins, Jill E, American Health Network of Indiana, LLC, Franklin, Indiana (30); Benjamin, Sabrina A, Universal Research Group, Tacoma, Washington (20); Benson, Mark R, American Health Network of Indiana, Avon, Indiana (27); Berger, Peter B, Buckley, Jeremy W (FPI), Geisinger Medical Center, Danville, Pennsylvania (32); Betz, William R Lake Erie Medical Group, PC, Erie, Pennsylvania (13); Biederman, Robert WW, Allegheny General Hospital, Pittsburgh, Pennsylvania (21); Bisher III, Edward W, Baptist Heart Specialists, Jacksonville, Florida (40); Bittner, Vera A, Dr. Vera Bittner, The University of Alabama at Birmingham, Birmingham, Alabama (13); Breton, Cristian F, International Research Associates, LLC, Miami, Florida (14); Buttaci, Salvatore, Changlani, Mahesh (FPI), Patterson, John B (FPI), Cardiovascular Institute of the South, New Iberia, Louisiana (21); Byrd, Leroy J, Rowan Research, Spokane, Washington (12); Canaday, Donald B, Rockwood Inland Cardiology Associates, Spokane, Washington (27); Cashion, Jr, William R, Austin Heart P.L.L.C, Harker Heights, Texas (14); Chandna, Harish, Victoria Heart and Vascular Center, Victoria, Texas (14); Chang, Anna R, John Muir Physicians, Network Clinical Research Center, Concord, California (11); Chin, John, Regional Cardiology Associates, Sacramento, California (6); Claybrook, Harry P, Martin, Frederick A (FPI), Internal Medicine and Pediatric Associates of Bristol, PC, Bristol, Tennessee (21); Cohen, Kenneth R, New West Physicians, PC, Golden, Colorado (18); Colan, David R, Internal Medical Associates of Grand Island, PC, Grand Island, Nebraska (18); Coodley, Gregg O, Fanno Creek Clinic, LLC, Portland, Oregon (14); Corson, Marshall A, Knopp, Robert H (FPI), Paramsothy, Pathmaja (FPI), Harborview Medical Center, Seattle, Washington (19); Cottiero, Richard A, Hypertension and Nephrology Inc., Providence, Rhode Island (17); Dandona, Paresh, Diabetes-Endocrinology Center of Western New York, Williamsville, New York (9); Davidson, Michael H, Kamaradt, Kent T (FPI), Radiant Research, Inc., Chicago, Illinois (18); Davuluri, Ashwini K, Baptist Heart Spealists, P.A., Jacksonville, Florida (16); Desai, Vikas S, Garson, Glen D (FPI), Charles River Medical Associates, Natick, Massachusetts (14); East, Cara Soltero Cardiovascular Research Center, Dallas, Texas (19); Ebrahimi, Ramin, Ramin Ebrahimi, M.D. Inc., Los Angeles, California (6); Ellison, Howard S, Rockdale Medical - Research Associates, Conyers, Georgia (28); Erickson, Bernard R, CentraCare Heart and Vascular Center at St Cloud Hospital, St Cloud, Minnesota (25); Fernandes, Valerian L, Ralph H Johnson VA Medical Center, Charleston, South Carolina (21); Flores, Angel R, Heritage Valley Medical Group, Inc., Beaver, Pennsylvania (64); Folkerth, Steven D, Clinical Research Center of Nevada, Las Vegas, Nevada (2); Foster, Robert E, Birmingham Heart Clinic, PC, Birmingham, Alabama (9); Gaona, Sr., Raul E, Briggs Clinical Research, LLC, San Antonio, Texas (8); Gardner, Timothy J, Northside Internal Medicine, Spokane, Washington (19); George, William H, Cadillac Clinical Research LLC., Cadillac, Michigan (5); Gessler, Carl J JR, The Heart Center Research LLC, Huntsville, Alabama (9); Gill, Santosh K, Fox Valley Clinical Research LLC, Aurora, Illinois (13); Go, Alan S, Kaiser Permanente Santa Clara Medical Center, Santa Clara, California (17); Go, Alan S, Kaiser Permanente Division of Research, Oakland, California (19); Goldberg, Anne C, Washington University School of Medicine, St. Louis, Missouri (17); Goldschmidt, Marc E, New Jersey Cardiology Associates,

West Orange, New Jersey (6); Gorman, Timothy A, Brautigam, Donald F (FPI), Great Lakes Medical Research, Westfield, New York (44); Guyton, John R, Duke University Medical Center, Durham, North Carolina (17); Haffey, Thomas, Western Cardiology Associates, Thornton, Colorado (6); Henry, Sheldon D, Geisinger Clinic, Geisinger Medical Group-Grays Woods, Port Matilda, Pennsylvania (28); Hermany, Paul R, Grand View - Lehigh Valley Health Services, Sellersville, Pennsylvania (28); Hoekstra, John A, National Clinical Research-Richmond Inc., Richmond, Virginia (14); Hudson, Michael, Henry Ford Hospital, Detroit, Michigan (7); Iteld, Bruce J, Louisiana Heart Center, Slidell, Louisiana (16); Jack, David B, Lonepeak Family Medicine, Draper, Utah (14); Johnson Jr., Frank P, Advanced Therapeutics Inc., Johnson City, Tennessee (26); Joswig, Bill C, Arch Health Partners, Poway, California (19); Kaissar, Amy J, Dawes Friezlin Clinical Research Group, LLC, Indianapolis, Indiana (10); Karns, Adam D, Karns, Robert M (FPI), Adam D Karns, MD, Los Angeles, California (28); Kaster, Steven R, Wenatchee Valley Medical Center, Wenatchee, Washington (31); Kerzner, Boris, Health Trends Research LLC, Baltimore, Maryland (76); Khan, Mohammed S, Ahmed, Ismail S (FPI), North Ohio Research Ltd, Westlake, Ohio (10); Kieval, Joshua, ZASA Clinical Research, Atlantis, Florida (5); Kim, Edward, Eastside Cardiology Associates, Kirkland, Washington (10); Klaff, Leslie J, Rainer Clinical Research Center Inc, Renton, Washington (16); Klein, Eric J, Capital Clinical Research Center, Olympia, Washington (21); Koren, Michael J, Jacksonville Center for Clinical Research, Jacksonville, Florida (25); Kosinski, Edward J, Connecticut Clinical Research, Bridgeport, Connecticut (26); Krumian, Razmig, Portnoy, Edward B (FPI), Westlake Medical Research, Thousand Oaks, California (2); Kuvin, Jeffrey T, Tufts Medical Center, Boston, Massachusetts (6); Langer, Michael M, North Ohio Research, Ltd., Elyria, Ohio (16); Letts, Dustin P, Caro Mont Heart, Gastonia, North Carolina (55); Lipetz, Robert S, Encompass Clinical Research, Spring Valley, California (11); Long, William J, Thomas, Ignatius (FPI), Medical Research Institute, Slidell, Louisiana (33); Lopes-Virella, Maria, Medical University of South Carolina, Charleston, South Carolina (10); Lubin, Barry C, National Clinical Research-Norfolk, Inc., Norfolk, Virginia (23); Martin, Richard A, Geisinger Clinic, Geisinger Medical Group-Lake Scranton, Scranton, Pennsylvania (9); Masri, Bassem, Weill Medical College of Cornell University/NYPH, New York, New York (11); Matthews, George, Corbelli, John C (FPI), Buffalo Cardiology and Pulmonary Associates,P.C, Williamsville, New York (15); McCullum, Kevin, York Hospital Wellspan, York, Pennsylvania (14); Meholick, Alan W, Buffalo Heart Group, Buffalo, New York (28); Mitchell, Jerry R, Texas Center for Drug Development, PA, Houston, Texas (18); Modares, Fariba, Geisinger Clinic, Geisinger Medical Group-Kistler, Wilkes-Barre, Pennsylvania (16); Mohler, Emile, Hospital of the University of Pennsylvania, Philadelphia, Pennsylvania (2); Morcos, Charle N, Apex Research Institute, Santa Ana, California (31); Murdock, David K, Aspirus Cardiovascular Associates, Wausau, Wisconsin (20); Narayan, Puneet, Clinical Research Institute of Northern Virginia, Burke, Virginia (25); Oberoi, Mandeep S, Central Jersey Medical Research Center, Elizabeth, New Jersey (46); O'Connor, Thomas, Schnecker, Robert J (FPI), American Health Network of Indiana, LLC, Greenfield, Indiana (36); O'Donnell, Philip J, Selma Medical Associates, Winchester, Virginia (40); Ong, Stephen T, MD Medical Research, Oxon Hill, Maryland (11); Parang, Pirouz Deborah Heart and Lung Centre, Browns Mills, New Jersey (4); Pasquini, John A, Mid Carolina Cardiology/Novant Health-NMG, Charlotte, North Carolina (58); Patel, Rajesh J, Lycoming Internal Medicine, Inc., Jersey Shore, Pennsylvania (30); Patlola, Raghotham, Cardiovascular Institute of the South, Lafayette, Louisiana (19); Penny, William, VA San Diego Healthcare System, San Diego, California (14); Pepine, Carl J, University of Florida, Gainesville, Florida (18); Pierce, Charles H, Stein, Evan A (FPI), Metabolic and Atherosclerosis Research Center, Cincinnati, Ohio (55); Popeil, Larry R, Magnolia Research Group Inc., Ocala, Florida (12); Pratt, Stephen E, West Coast Research, LLC, San Ramon, California (14); Price, Robert W, Mid Carolina Cardiology PA, Matthews, North Carolina (47); Raikhel, Marina, Torrence Clinical Research, Lomita, California (20); Ravi, Ram C, Cho, Donald (FPI), North Ohio Research, Ltd., Middleburg Heights, Ohio (22); Rhyne, James M, The Lipid Center, Statesville, North Carolina (15); Richards, Mary K, Mary K. Richards, MD, PA, Little Rock, Arkansas (16); Rivera, Ernesto, Amarillo Heart Group, Amarillo, Texas (11); Robinson, Jennifer G, Preventive Intervention Center, Iowa City, Iowa (67); Roth, Eli M, Sterling Research Group Ltd, Cincinnati, Ohio (33); Rubenstein, Carl

J, Oklahoma Cardiovascular Research Group, Oklahoma City, Oklahoma (15); Sandoval, Jaime D, Padre Coast Clinical Research, Corpus Christi, Texas (25); Sangrigoli, Renee A, Doylestown Cardiology Associates VAAA, Doylestown, Pennsylvania (22); Schramm, Erich L, St. Johns Clinical Research Center, Ponte Vedra, Florida (23); Schwartzbard, Arthur, New York University, New York (10); Serfer, Gregory T, South Florida Clinical Research Center, Hollywood, Florida (3); Shah, Dhiren H, Shah Associates, PA, Prince Frederick, Maryland (25); Shalek, Marc S, Legacy Heart Center, Plano, Texas (45); Shanes, Jeffrey G, Consultants in Cardiovascular Medicine, Melrose Park, Illinois (16); Sharma, Marigene S, Bretton, Elizabeth M (FPI), Albuquerque Clinical Trials, Inc., Albuquerque, New Mexico (15); Sheikh, Zafar, Internal Medicine Associates, Madera, California (3); Sklaver, Neal L, Medical Specialists Associated, Dallas, Texas (18); Solano, Maria Del Pilar, Goldberg, Ronald B (FPI), University of Miami, Diabetes Research Institute, Miami, Florida (6); Srivastava, Nalin K, South Carolina Pharmaceutical Research, Spartanburg, South Carolina (7); Staniloae, Cezar S, Gotham Cardiovascular Research, PC, New York (37); Staub, Jonathan S, Wilmington Medical Research, Wilmington, North Carolina (18); Stillabower, Michael E, Christiana Care Health System, Christiana Care Hospital, Newark, Delaware (17); Suresh, Damodhar P, St. Elizabeth Physicians, Crestview Hills, Kentucky (19); Szulawski, Ireneusz, Geisinger Clinic, Geisinger Medical Group-Lewistown, Lewistown, Pennsylvania (16); Thompson, Paul, Polk, Donna M (FPI), Hartford Hospital, Hartford, Connecticut (14); Tinkel, Jodi L, Pandya, Utpal H (FPI), University of Toledo Medical Centre, Toledo, Ohio (9); Toth, Phillip T, Midwest Institute For Clinical Research, Indianapolis, Indiana (17); Traboulssi, Mourhaf, North Ohio Heart Centre, Inc, Sandusky, Ohio (53); Tuohy IV, Edward R, Bridgeport Hospital, Bridgeport, Connecticut (8); Uusinarkaus, Kari T, Clinical Research Advantage, Inc, Colorado Springs, Colorado (7); Vijay, Nampalli K, Aurora Denver Cardiology Associates, Denver, Colorado (18); Voyce, Stephen, Advanced Cardiology Specialists, Scranton, Pennsylvania (18); Wainwright, William, RHancock, Holly (FPI), Baptist Heart Specialists, Jacksonville Beach, Florida (28); Walder, James S, Black Hills Cardiovascular Research Group Cardiology Associates, P.C., Rapid City, South Dakota (56); Wang, Tracy Yu-Ping, Duke University Medical Center, Durham, North Carolina (15); Watkins, Stanley P, Alaska Heart Institute, Anchorage, Alaska (11); Weiss, Robert J, Maine Research Associates, Auburn, Maine (66); Whitney, Edwin J, BHS Speciality Network, Inc., San Antonio, Texas (7); Wickemeyer, William J, Iowa Heart Center, West Des Moines, Iowa (55); Willis, John G, San Gabriel Clinical Research, Georgetown, Texas (12); Wilson, Dennis F, Abrams, Cyril (FPI), Mid Carolina Cardiology, Salisbury, North Carolina (23); Wiseman, Alan, Eastern Maine Medical Centre, Bangor, Maine (17); Wolfson, Eric, Wolfson Medical Centre, Las Vegas, Nevada (14); Wright, David, Central Texas Clinical Research, Austin, Texas (19); Zawada, Jr. Edward T, Verma, Suneet (FPI), Avera Research Institute, Sioux Falls, South Dakota (14).
